# Supplementary material for: A CREB1/miR-433 reciprocal feedback loop modulates proliferation and metastasis in colorectal cancer
Source: publisher site journal article supplement (doi:10.18632/aging.101671), 2018-12-06
Supplement: Supplementary file [file aging-v10i12-101671-supplementary-material-SD1.pdf]

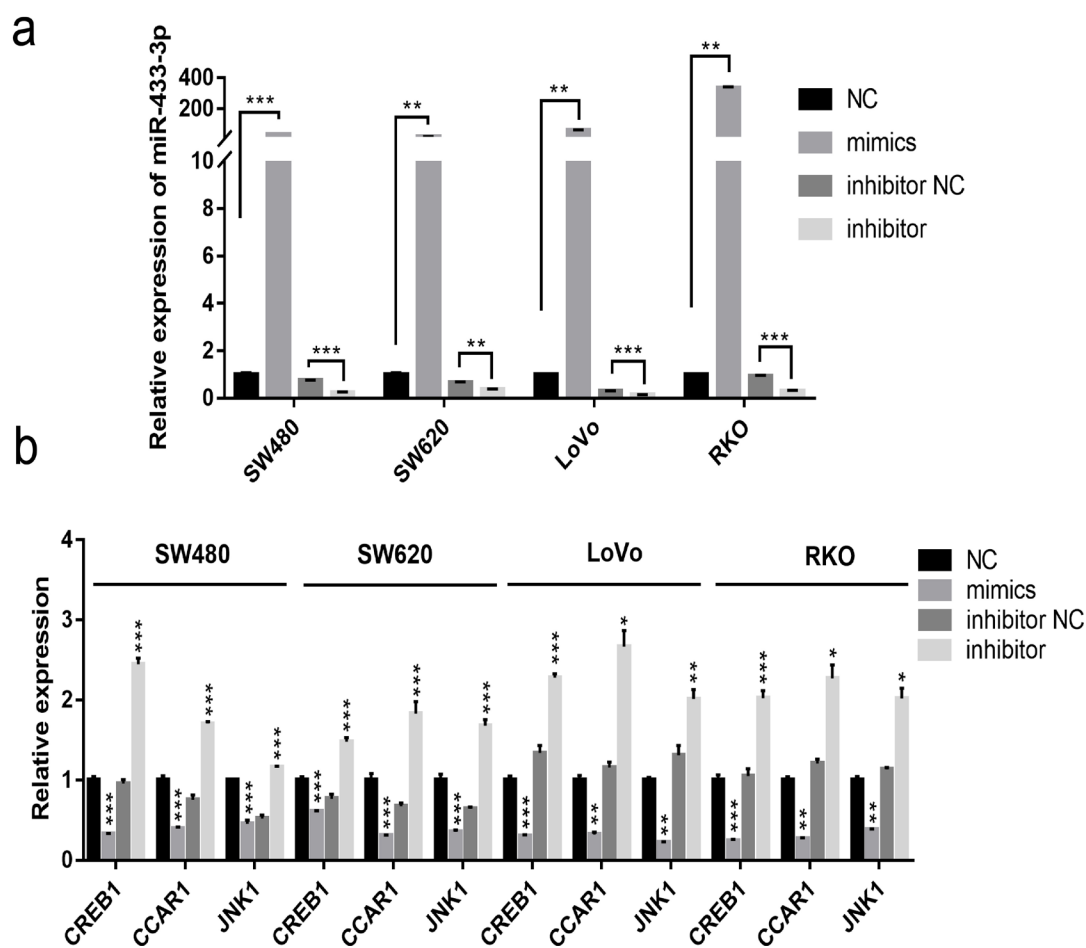

**Supplementary Figure S1. Successful transient transfection of CRC cells with miR-433.** (a) The relative expression of miR-433-3p after SW480, SW620, LoVo and RKO cells were transfected with an miR-433-3p mimics or inhibitor. (b) The expression changes in CREB1, CCAR1 and JNK1 after cell transfection. NC, negative control; mimics, miR-433 mimics; inhibitor NC, negative control for inhibitor; inhibitor, inhibitor of miR-433. \*,  $p < 0.05$ ; \*\*,  $p < 0.01$ ; \*\*\*,  $p < 0.001$ .
