# Supplementary material for: A CREB1/miR-433 reciprocal feedback loop modulates proliferation and metastasis in colorectal cancer
Source: publisher site journal article supplement (doi:10.18632/aging.101671), 2018-12-06
Supplement: Supplementary file [file aging-v10i12-101671-supplementary-material-SD2.pdf]

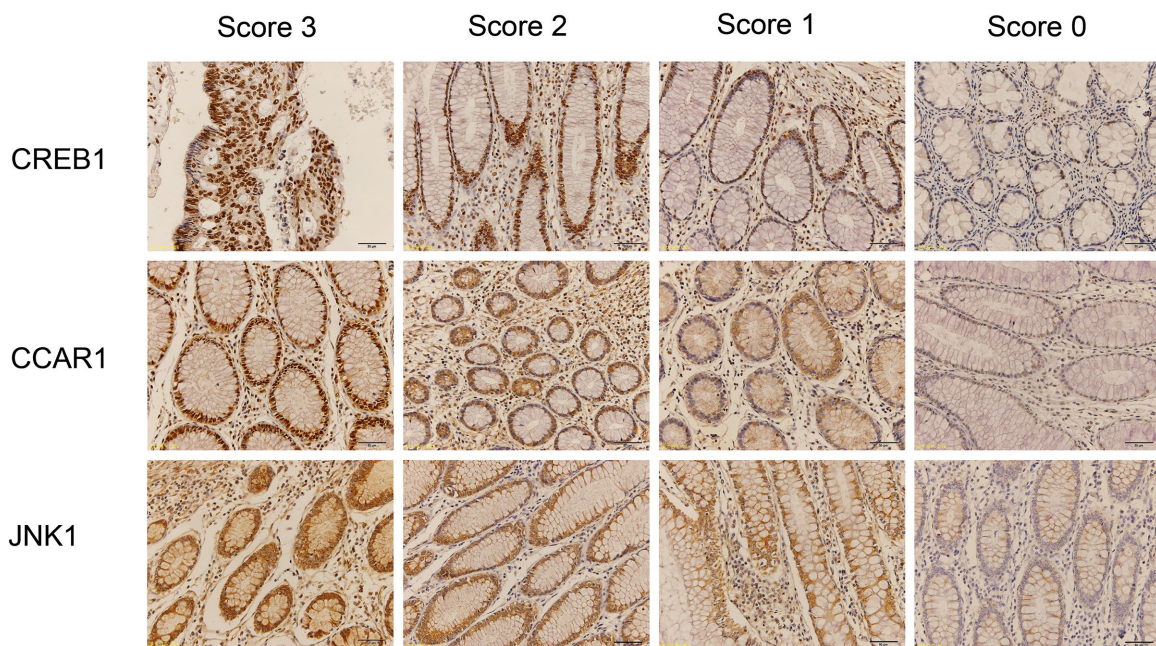

**Supplementary Figure S2. Representative high-power field IHC images of CREB1, CCAR1 and JNK1 staining are presented according to the stratified intensity.**
