# Supplementary material for: A CREB1/miR-433 reciprocal feedback loop modulates proliferation and metastasis in colorectal cancer
Source: publisher site journal article supplement (doi:10.18632/aging.101671), 2018-12-06
Supplement: Supplementary file [file aging-v10i12-101671-supplementary-material-SD3.pdf]

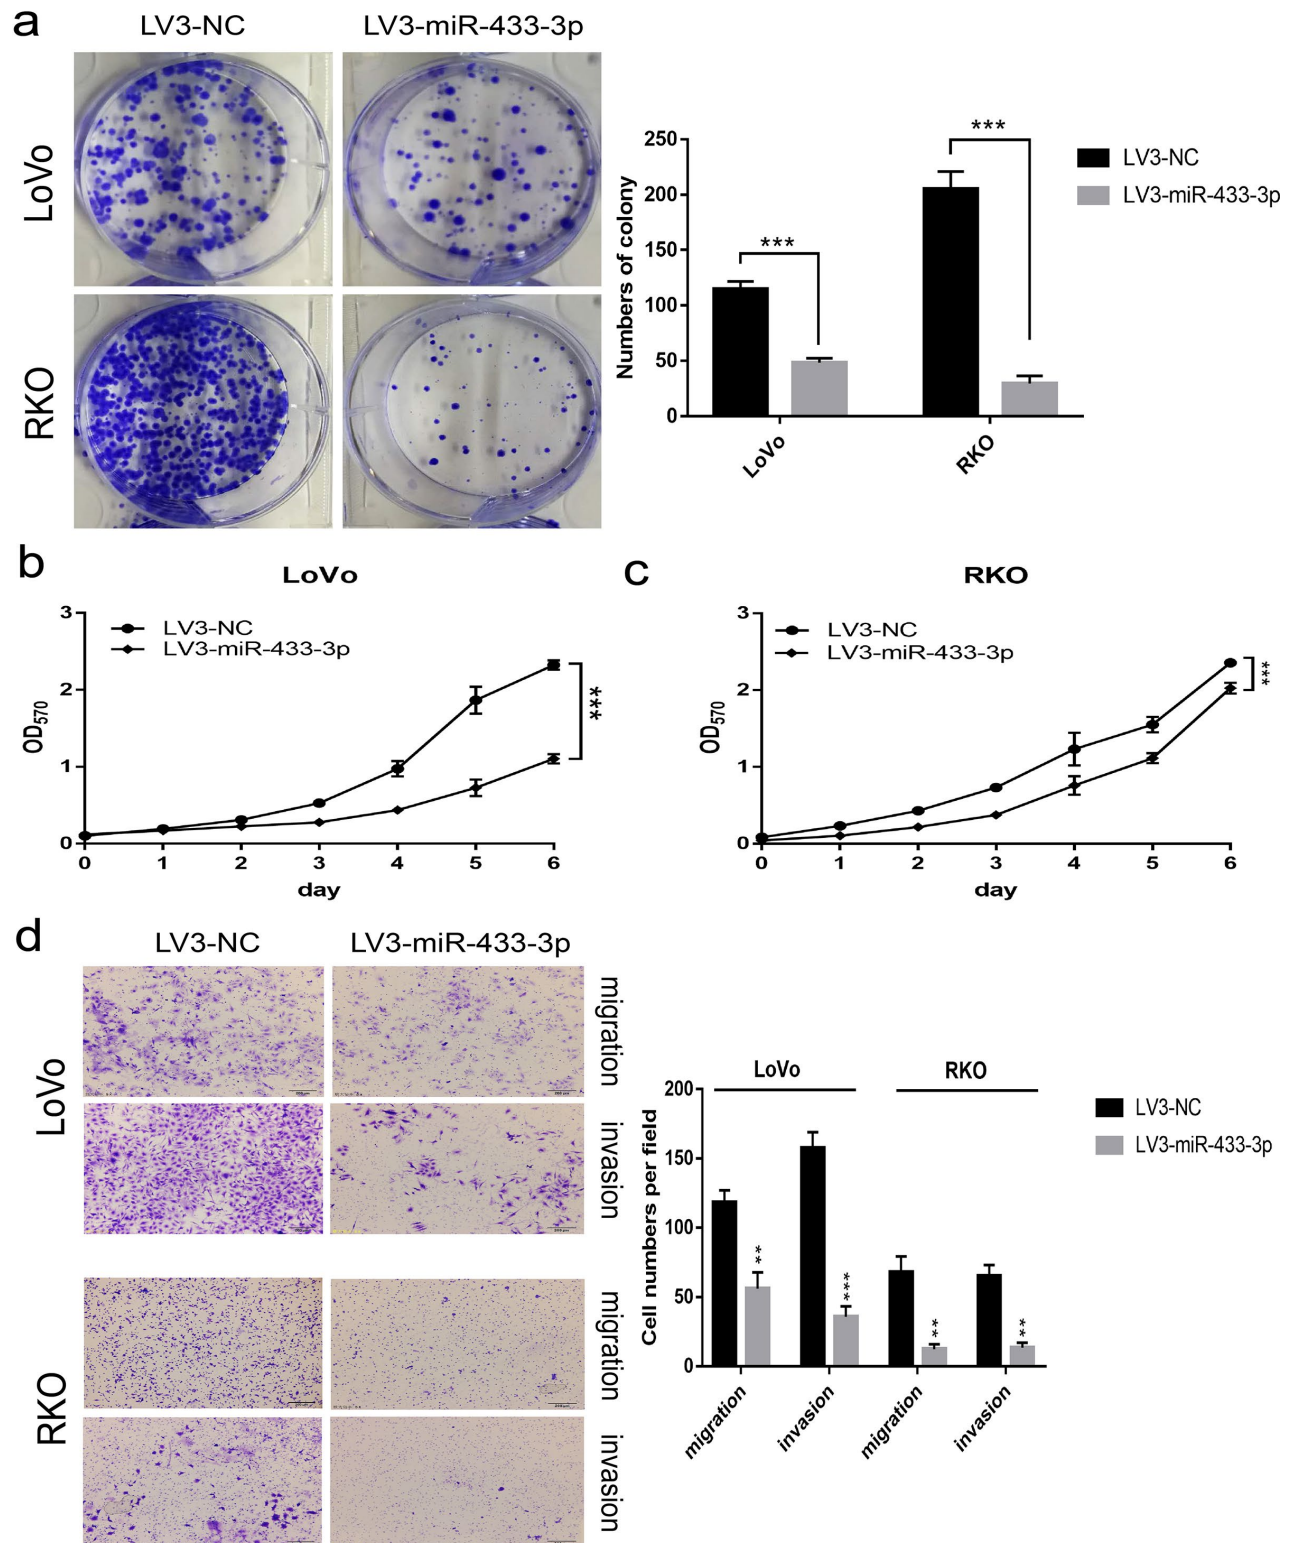

**Supplementary Figure S3. LV3-miR-433-3p infection suppressed proliferation, migration and invasion in LoVo and RKO cells.** (a) LV3-miR-433-3p infection alleviated the colony formation activity of CRC cells. LV3-miR-433-3p reduced the cell viability in LoVo (b) and RKO (c) cells. (d) LV3-miR-433-3p restrained the migration and invasion of CRC cells. \*\*,  $p < 0.01$ ; \*\*\*,  $p < 0.001$ .
